# Supplementary material for: The underestimated role of temperature–oxygen relationship in large‐scale studies on size‐to‐temperature response
Source: PubMed Central journal article supplement (PMC5606864; doi:10.1002/ece3.3263), 2017-08-11
Supplement: ECE3-7-7434-s001.pdf [file ECE3-7-7434-s001.pdf]

|      | <b>axis 1</b> | <b>axis 2</b> |
|------|---------------|---------------|
| Temp | 0.79          | -0.40         |
| pH   | 0.82          | -0.16         |
| Cond | 0.92          | 0.33          |
| DOC  | 0.33          | 0.55          |
| DO   | -0.74         | 0.44          |
| NH4  | -0.14         | 0.35          |
| NO3  | 0.28          | -0.39         |
| TN   | -0.10         | 0.89          |
| PO4  | -0.02         | -0.83         |
| TP   | 0.37          | -0.83         |
| Ca2+ | 0.75          | 0.40          |
| K+   | 0.93          | -0.20         |
| Mg2+ | 0.54          | 0.73          |
| Na2+ | 0.92          | 0.13          |
| Si   | 0.96          | 0.02          |
| Cl-  | -0.84         | -0.17         |
| SO2  | -0.12         | -0.14         |
