# Supplementary material for: The underestimated role of temperature–oxygen relationship in large‐scale studies on size‐to‐temperature response
Source: PubMed Central journal article supplement (PMC5606864; doi:10.1002/ece3.3263), 2017-08-11
Supplement: ECE3-7-7434-s002.pdf [file ECE3-7-7434-s002.pdf]

**Appendix S2.** The list of species excluded from our analyses because of their rarity, by removal from the whole dataset or from a particular stream group; a - occurrence restricted to one stream in a whole dataset; b - only one value within a dataset; c - occurrence restricted to one stream within a particular stream group

| <b>species excluded</b>       | <b>dataset</b> | <b>reason</b> |
|-------------------------------|----------------|---------------|
| <i>Achnanthes stolidia</i>    | whole          | a             |
| <i>Pinnularia ignobilis</i>   | whole          | a             |
| <i>Navicula cryptotenella</i> | whole          | a             |
| <i>Frustulia vulgaris</i>     | whole          | a             |
| <i>Navicula tripunctata</i>   | whole          | a             |
| <i>Achnanthes minutissima</i> | whole          | b             |
| <i>Achnanthes grana</i>       | whole          | b             |
| <i>Caloneis lauta</i>         | stream group 1 | c             |
| <i>Epithemia turgida</i>      | stream group 1 | c             |
| <i>Fragilaria construens</i>  | stream group 1 | c             |
| <i>Gomphonema clevei</i>      | stream group 1 | c             |
| <i>Melosira varians</i>       | stream group 1 | c             |
| <i>Navicula placentula</i>    | stream group 1 | c             |
| <i>Nitzschia dissipata</i>    | stream group 1 | c             |
| <i>Nitzschia fonticola</i>    | stream group 1 | c             |
| <i>Nitzschia palea</i>        | stream group 1 | c             |
| <i>Nitzschia paleacea</i>     | stream group 1 | c             |
| <i>Rhopalodia gibba</i>       | stream group 1 | c             |

|                                 |                |   |
|---------------------------------|----------------|---|
| <i>Amphora inariensis</i>       | stream group 2 | c |
| <i>Amphora pediculus</i>        | stream group 2 | c |
| <i>Cocconeis pediculus</i>      | stream group 2 | c |
| <i>Cymbella sinuata</i>         | stream group 2 | c |
| <i>Epithemia sorex</i>          | stream group 2 | c |
| <i>Fragilaria arcus</i>         | stream group 2 | c |
| <i>Fragilaria construens</i>    | stream group 2 | c |
| <i>Gomphonema clavatum</i>      | stream group 2 | c |
| <i>Gomphonema clevei</i>        | stream group 2 | c |
| <i>Navicula atomus</i>          | stream group 2 | c |
| <i>Nitzschia fonticola</i>      | stream group 2 | c |
| <i>Nitzschia inconspicua</i>    | stream group 2 | c |
| <i>Rhoicosphenia abbreviata</i> | stream group 2 | c |
| <i>Caloneis lauta</i>           | stream group 3 | c |
| <i>Cymbella sinuata</i>         | stream group 3 | c |
| <i>Diatoma mesodon</i>          | stream group 3 | c |
| <i>Fragilaria arcus</i>         | stream group 3 | c |
| <i>Fragilaria pinnata</i>       | stream group 3 | c |
| <i>Gomphonema clavatum</i>      | stream group 3 | c |
| <i>Meridion circulare</i>       | stream group 3 | c |
| <i>Navicula placentula</i>      | stream group 3 | c |
