# Supplementary material for: The underestimated role of temperature–oxygen relationship in large‐scale studies on size‐to‐temperature response
Source: PubMed Central journal article supplement (PMC5606864; doi:10.1002/ece3.3263), 2017-08-11
Supplement: ECE3-7-7434-s003.pdf [file ECE3-7-7434-s003.pdf]

|      | Temp                 | pH                | Cond                | DOC               | DO                   | NH4               | NO3               | TN                | PO4                | TP                 | Ca                | K                   | Mg                  | Na                  | Si                  | Cl                | SO4               |
|------|----------------------|-------------------|---------------------|-------------------|----------------------|-------------------|-------------------|-------------------|--------------------|--------------------|-------------------|---------------------|---------------------|---------------------|---------------------|-------------------|-------------------|
| Temp |                      | 0.5934<br>p=.025  | 0.3206<br>p=.264    | 0.186<br>p=.524   | -0.9225<br>p=.000003 | -0.155<br>p=.597  | 0.5668<br>p=.035  | -0.5208<br>p=.056 | 0.1922<br>p=.510   | 0.5421<br>p=.045   | 0.403<br>p=.153   | 0.7743<br>p=.001    | -0.1051<br>p=.721   | 0.2099<br>p=.471    | 0.7598<br>p=.002    | -0.4383<br>p=.117 | 0.1883<br>p=.519  |
| pH   | 0.5934<br>p=.025     |                   | 0.5347<br>p=.049    | 0.0505<br>p=.864  | -0.5859<br>p=.028    | -0.2444<br>p=.400 | 0.3407<br>p=.233  | -0.0874<br>p=.766 | 0.155<br>p=.597    | 0.4648<br>p=.094   | 0.6717<br>p=.009  | 0.6986<br>p=.005    | 0.2132<br>p=.464    | 0.434<br>p=.121     | 0.7026<br>p=.005    | -0.7188<br>p=.004 | 0.0375<br>p=.899  |
| Cond | 0.3206<br>p=.264     | 0.5347<br>p=.049  |                     | 0.403<br>p=.153   | -0.3237<br>p=.259    | -0.0615<br>p=.835 | -0.1334<br>p=.649 | 0.1674<br>p=.567  | -0.2305<br>p=.428  | 0.0535<br>p=.856   | 0.6358<br>p=.015  | 0.7211<br>p=.004    | 0.8959<br>p=.00002  | 0.9659<br>p<.000001 | 0.825<br>p=.0003    | -0.7972<br>p=.001 | -0.3041<br>p=.291 |
| DOC  | 0.186<br>p=.524      | 0.0505<br>p=.864  | 0.403<br>p=.153     |                   | -0.1988<br>p=.496    | -0.2137<br>p=.463 | 0.1572<br>p=.592  | 0.4026<br>p=.153  | -0.5932<br>p=.025  | -0.5107<br>p=.062  | 0.2951<br>p=.306  | 0.1688<br>p=.564    | 0.386<br>p=.173     | 0.3121<br>p=.277    | 0.3629<br>p=.202    | -0.238<br>p=.413  | -0.2115<br>p=.468 |
| DO   | -0.9225<br>p=.000003 | -0.5859<br>p=.028 | -0.3237<br>p=.259   | -0.1988<br>p=.496 |                      | 0.1444<br>p=.622  | -0.5823<br>p=.029 | 0.3911<br>p=.167  | -0.2147<br>p=.461  | -0.4841<br>p=.079  | -0.3691<br>p=.194 | -0.7805<br>p=.001   | 0.0739<br>p=.802    | -0.2277<br>p=.434   | -0.7491<br>p=.002   | 0.4483<br>p=.108  | -0.1008<br>p=.732 |
| NH4  | -0.155<br>p=.597     | -0.2444<br>p=.400 | -0.0615<br>p=.835   | -0.2137<br>p=.463 | 0.1444<br>p=.622     |                   | -0.3513<br>p=.218 | 0.3914<br>p=.166  | -0.2747<br>p=.342  | -0.231<br>p=.427   | 0.1929<br>p=.509  | -0.1544<br>p=.598   | 0.0425<br>p=.885    | -0.1539<br>p=.599   | -0.0551<br>p=.851   | 0.2399<br>p=.409  | 0.4432<br>p=.112  |
| NO3  | 0.5668<br>p=.035     | 0.3407<br>p=.233  | -0.1334<br>p=.649   | 0.1572<br>p=.592  | -0.5823<br>p=.029    | -0.3513<br>p=.218 |                   | -0.2803<br>p=.332 | 0.0005<br>p=.999   | 0.1147<br>p=.696   | 0.0637<br>p=.829  | 0.2572<br>p=.375    | -0.3769<br>p=.184   | -0.2185<br>p=.453   | 0.2403<br>p=.408    | -0.0071<br>p=.981 | 0.1018<br>p=.729  |
| TN   | -0.5208<br>p=.056    | -0.0874<br>p=.766 | 0.1674<br>p=.567    | 0.4026<br>p=.153  | 0.3911<br>p=.167     | 0.3914<br>p=.166  | -0.2803<br>p=.332 |                   | -0.654<br>p=.011   | -0.7656<br>p=.001  | 0.4089<br>p=.147  | -0.3551<br>p=.213   | 0.3939<br>p=.163    | 0.0618<br>p=.834    | -0.138<br>p=.638    | -0.0711<br>p=.809 | 0.1452<br>p=.620  |
| PO4  | 0.1922<br>p=.510     | 0.155<br>p=.597   | -0.2305<br>p=.428   | -0.5932<br>p=.025 | -0.2147<br>p=.461    | -0.2747<br>p=.342 | 0.0005<br>p=.999  | -0.654<br>p=.011  |                    | 0.8727<br>p=.00005 | -0.389<br>p=.169  | 0.1188<br>p=.686    | -0.3711<br>p=.191   | -0.1205<br>p=.681   | -0.0605<br>p=.837   | 0.0268<br>p=.928  | -0.1897<br>p=.516 |
| TP   | 0.5421<br>p=.045     | 0.4648<br>p=.094  | 0.0535<br>p=.856    | -0.5107<br>p=.062 | -0.4841<br>p=.079    | -0.231<br>p=.427  | 0.1147<br>p=.696  | -0.7656<br>p=.001 | 0.8727<br>p=.00005 |                    | -0.0789<br>p=.789 | 0.5032<br>p=.067    | -0.2248<br>p=.440   | 0.1129<br>p=.701    | 0.3378<br>p=.238    | -0.2512<br>p=.386 | -0.0912<br>p=.757 |
| Ca   | 0.403<br>p=.153      | 0.6717<br>p=.009  | 0.6358<br>p=.015    | 0.2951<br>p=.306  | -0.3691<br>p=.194    | 0.1929<br>p=.509  | 0.0637<br>p=.829  | 0.4089<br>p=.147  | -0.389<br>p=.169   | -0.0789<br>p=.789  |                   | 0.4893<br>p=.076    | 0.4222<br>p=.133    | 0.4401<br>p=.115    | 0.6363<br>p=.014    | -0.7539<br>p=.002 | 0.4553<br>p=.102  |
| K    | 0.7743<br>p=.001     | 0.6986<br>p=.005  | 0.7211<br>p=.004    | 0.1688<br>p=.564  | -0.7805<br>p=.001    | -0.1544<br>p=.598 | 0.2572<br>p=.375  | -0.3551<br>p=.213 | 0.1188<br>p=.686   | 0.5032<br>p=.067   | 0.4893<br>p=.076  |                     | 0.3932<br>p=.164    | 0.6898<br>p=.006    | 0.9318<br>p=.000001 | -0.7181<br>p=.004 | -0.1545<br>p=.598 |
| Mg   | -0.1051<br>p=.721    | 0.2132<br>p=.464  | 0.8959<br>p=.00002  | 0.386<br>p=.173   | 0.0739<br>p=.802     | 0.0425<br>p=.885  | -0.3769<br>p=.184 | 0.3939<br>p=.163  | -0.3711<br>p=.191  | -0.2248<br>p=.440  | 0.4222<br>p=.133  | 0.3932<br>p=.164    |                     | 0.9157<br>p=.000004 | 0.5314<br>p=.051    | -0.5679<br>p=.034 | -0.4446<br>p=.111 |
| Na   | 0.2099<br>p=.471     | 0.434<br>p=.121   | 0.9659<br>p<.000001 | 0.3121<br>p=.277  | -0.2277<br>p=.434    | -0.1539<br>p=.599 | -0.2185<br>p=.453 | 0.0618<br>p=.834  | -0.1205<br>p=.681  | 0.1129<br>p=.701   | 0.4401<br>p=.115  | 0.6898<br>p=.006    | 0.9157<br>p=.000004 |                     | 0.7454<br>p=.002    | -0.7252<br>p=.003 | -0.4834<br>p=.080 |
| Si   | 0.7598<br>p=.002     | 0.7026<br>p=.005  | 0.825<br>p=.0003    | 0.3629<br>p=.202  | -0.7491<br>p=.002    | -0.0551<br>p=.851 | 0.2403<br>p=.408  | -0.138<br>p=.638  | -0.0605<br>p=.837  | 0.3378<br>p=.238   | 0.6363<br>p=.014  | 0.9318<br>p=.000001 | 0.5314<br>p=.051    | 0.7454<br>p=.002    |                     | -0.7431<br>p=.002 | -0.1134<br>p=.699 |
| Cl   | -0.4383<br>p=.117    | -0.7188<br>p=.004 | -0.7972<br>p=.001   | -0.238<br>p=.413  | 0.4483<br>p=.108     | 0.2399<br>p=.409  | -0.0071<br>p=.981 | -0.0711<br>p=.809 | 0.0268<br>p=.928   | -0.2512<br>p=.386  | -0.7539<br>p=.002 | -0.7181<br>p=.004   | -0.5679<br>p=.034   | -0.7252<br>p=.003   | -0.7431<br>p=.002   |                   | -0.0551<br>p=.852 |

SO4

|        |        |         |         |         |        |        |        |         |         |        |         |         |         |         |         |  |
|--------|--------|---------|---------|---------|--------|--------|--------|---------|---------|--------|---------|---------|---------|---------|---------|--|
| 0.1883 | 0.0375 | -0.3041 | -0.2115 | -0.1008 | 0.4432 | 0.1018 | 0.1452 | -0.1897 | -0.0912 | 0.4553 | -0.1545 | -0.4446 | -0.4834 | -0.1134 | -0.0551 |  |
| p=.519 | p=.899 | p=.291  | p=.468  | p=.732  | p=.112 | p=.729 | p=.620 | p=.516  | p=.757  | p=.102 | p=.598  | p=.111  | p=.080  | p=.699  | p=.852  |  |
